# Supplementary material
Source: ML conference proceedings conference paper supplement (https://www.ecva.net/papers/eccv_2022/papers_ECCV/html/136850072_ECCV_2022_paper.php)
Supplement: Supplementary file 1 [file 136850072-supp.pdf]

# VL-LTR: Learning Class-wise Visual-Linguistic Representation for Long-Tailed Visual Recognition—Supplemental Materials

Changyao Tian<sup>1\*†</sup>, Wenhai Wang<sup>3\*</sup>, Xizhou Zhu<sup>2\*</sup>, Jifeng Dai<sup>2✉</sup>, Yu Qiao<sup>3</sup>  
<sup>1</sup>Chinese University of Hong Kong <sup>2</sup>SenseTime <sup>3</sup>Shanghai AI Laboratory  
 tcyhost@buaa.edu.cn {wangwenhai, qiaoyu}@pjlab.org.cn  
 {zhuwalter, daijifeng}@sensetime.com

## A1 Appendices

### A Methodology Details

For convenience, we summarize all the notations used in the paper in Table A1.

Table A1: Summary of notations used in the paper.

| Notation                          | Meaning                                  |
|-----------------------------------|------------------------------------------|
| $\mathcal{I} = \{I_i\}_{i=1}^N$   | A batch of $N$ image samples             |
| $\mathcal{T} = \{T_i\}_{i=1}^N$   | A batch of $N$ text samples              |
| $M$                               | Number of anchor sentences per class     |
| $\mathcal{E}_{\text{vis}}(\cdot)$ | Visual encoder                           |
| $\mathcal{E}_{\text{lin}}(\cdot)$ | Linguistic encoder                       |
| $E_i^I$                           | Embeddings of image $I_i$                |
| $E_i^T$                           | Embeddings of text $T_i$                 |
| $S_{i,j}$                         | Cosine similarity of $E_i^I$ and $E_j^T$ |
| $\langle E^I, G \rangle$          | Cosine similarity of $E^I$ and $G$       |
| $\mathcal{L}_{\text{ccl}}$        | Class-wise contrastive loss              |
| $\mathcal{L}_{\text{vis}}$        | Class-wise contrastive loss for images   |
| $\mathcal{L}_{\text{lin}}$        | Class-wise contrastive loss for texts    |
| $\mathcal{L}_{\text{dis}}$        | Distillation loss                        |
| $\mathcal{L}_{\text{pre}}$        | Pre-training loss                        |
| $\mathcal{L}_{\text{rec}}$        | Recognition loss                         |
| $\mathbf{y}$                      | Ground truth label                       |

### B Class-level Corpus Preparation

As described in Section 4.1, we collect class-level text descriptions from Wikipedia and prompt templates provided in [2]. In Figure A1, we display part of text descriptions collected for ImageNet-LT [1], Places-LT [1], and iNaturalist-2018 [3] datasets. We see

Table A2: **Detailed statistics of the class-level text descriptions for each dataset**, where  $M_{\min}$ ,  $M_{\max}$ ,  $M_{\text{mean}}$ , and  $M_{\text{Med}}$  denotes the minimum, maximum, mean, and median number of sentences of classes respectively, and  $L_{\text{Avg}}$  denotes the average number of tokens per sentence.

| Dataset              | $M_{\min}$ | $M_{\max}$ | $M_{\text{mean}}$ | $M_{\text{Med}}$ | $L_{\text{Avg}}$ |
|----------------------|------------|------------|-------------------|------------------|------------------|
| ImageNet-LT [1]      | 1          | 721        | 127               | 89               | 29               |
| Places-LT [1]        | 2          | 610        | 116               | 77               | 29               |
| iNaturalist 2018 [3] | 1          | 1774       | 33                | 17               | 26               |

that since these texts are all crawled from the Internet, it is inevitable to have some noisy text within them.

In addition, we report detailed statistics of the collected text descriptions in Table A2, where we find that even if all the corpus comes from Wikipedia, the text quantity of different classes varies greatly.

## C Computation Overhead

As mentioned in Section 3.1, our VL-LTR is a two-stage framework with two encoders. Nevertheless, we would like to point out that the computational cost of our method is almost the same as the vision-based method, since the linguistic encoder is not necessary at the inference stage. Specifically, after pre-training, the text embeddings of anchor sentences can be pre-populated offline. During inference, we only need to load the pre-populated text embeddings to perform visual recognition. As reported in Table A3, the GFLOPs and the inference speed of our method are similar to the baseline. These results are tested with a batch size of 128 on one V100 GPU and one 2.20GHz CPU in a single thread. Moreover, we believe such conclusion also applies to other backbones such as ViT, Swin, TransFG, and complementary attention, since our framework is orthogonal to the backbone’s structure.

Table A3: **Computation overhead comparison of our VL-LTR (ResNet-50) and the baseline (ResNet-50)**. Our method has almost the same GFLOPs and inference speed to the baseline. GFLOPs is calculated under the input scale of  $224 \times 224$ .

| Method        | GFLOPs | Time Cost (ms) |
|---------------|--------|----------------|
| Baseline      | 5.4    | 1.1            |
| VL-LTR (ours) | 5.5    | 1.3            |

## D Comparison with Zero-Shot CLIP

In Table A4, we compare our results and the zero-shot results of CLIP [2] on ImageNet-LT [1], Places-LT [1] and iNaturalist 2018 [3] datasets, respectively. We see that the

Table A4: **Comparison with Zero-Shot CLIP.** Our method achieves improvements on all datasets and is robust to datasets of different domains.

| Dataset          | Method        | Accuracy(%) |             |             |             |
|------------------|---------------|-------------|-------------|-------------|-------------|
|                  |               | Overall     | Many        | Medium      | Few         |
| ImageNet-LT      | Zero-Shot     | 59.8        | 60.8        | 59.3        | <b>58.6</b> |
|                  | Baseline      | 60.5        | 74.4        | 56.9        | 34.5        |
|                  | VL-LTR (ours) | <b>70.1</b> | <b>77.8</b> | <b>67.0</b> | 50.8        |
| Places-LT        | Zero-Shot     | 38.0        | 37.5        | 37.5        | <b>40.1</b> |
|                  | Baseline      | 39.7        | 50.8        | 38.6        | 22.7        |
|                  | VL-LTR (ours) | <b>48.0</b> | <b>51.9</b> | <b>47.2</b> | 38.4        |
| iNaturalist 2018 | Zero-Shot     | 3.4         | 6.1         | 3.3         | 2.9         |
|                  | Baseline      | 72.6        | 76.6        | 74.1        | 70.2        |
|                  | VL-LTR (ours) | <b>74.6</b> | <b>78.3</b> | <b>75.5</b> | <b>72.7</b> |

performance of CLIP drops sharply when the domain of target data (e.g., iNaturalist 2018) is inconsistent with its training data, while our method can achieve significant improvement on all datasets.

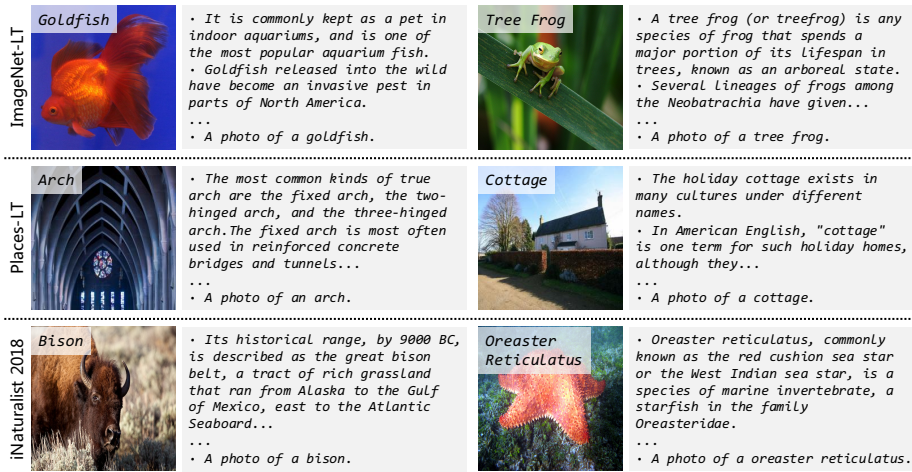

Fig. A1: Examples of text descriptions crawled from Wikipedia for ImageNet-LT [1], Places-LT [1] and iNaturalist-2018 [3], in which both redundant useful and noise information can be found.

## E Comparison of Different Distillation Methods in CVLP

To further study the influence of distillation in the pre-training phase, we try to use the pre-trained CLIP model [2] as the teacher model to distill the visual and linguistic

encoder of our model at the feature level, in addition to the logits distillation mentioned in Section 3.2. As reported in Table A5, both feature distillation and logits distillation can improve recognition accuracy, and our method achieves the highest accuracy on ImageNet-LT [1] when using logits distillation with the loss weight  $\lambda$  of 0.5.

Table A5: **Results of different types of distillation in CVLP on ImageNet-LT [1].** Our method achieves the highest accuracy when using logits distillation with the loss weight  $\lambda$  of 0.5.

| Distill Level | $\lambda$  | Accuracy (%) |             |             |             |
|---------------|------------|--------------|-------------|-------------|-------------|
|               |            | Overall      | Many        | Medium      | Few         |
| -             | 0          | 66.2         | 76.9        | 63.5        | 42.5        |
| Feature       | 0.1        | 67.3         | 77.3        | 64.4        | 44.0        |
|               | 0.5        | 68.0         | 77.6        | 65.2        | 45.5        |
| Logits        | 0.1        | 68.3         | <b>77.9</b> | 65.3        | 45.1        |
|               | 0.5 (ours) | <b>70.1</b>  | 77.8        | <b>67.0</b> | <b>50.8</b> |

## F Comparison of Different Text Description Sources

In Table A6, we compare the results of models using different kinds of text descriptions on ImageNet-LT [1]. Specifically, we use the prompt sentences provided in [2] as the source of text description. We mark this model as “prompt only”, and compare it with the default model that uses both Wikipedia and prompt templates as the source of text description (*i.e.*, “wiki + prompt”). We see that “wiki + prompt” outperforms “prompt only” in overall, medium, and few accuracy, which demonstrates the effectiveness of corpus from Wikipedia.

We also notice that although “prompt only” is not the best, its performance is still relatively competitive compared to the vision-based methods (*e.g.*, the strong Baseline established in this work). We attribute this phenomenon to reasons as follows: (1) Our method can make effective use of the pre-trained image and text encoder of CLIP [2], while vision-based methods can only use image encoder; (2) Some class names themselves contain discriminative language information, such as “gold fish”, “tree frog”, and “mountain bike”.

## G Visualization of AnSS

To intuitively show the effectiveness of our anchor sentence selection (AnSS), we also present some sentences recommended or filtered out by our AnSS of different classes in Figure A2. We see that our method can reserve useful texts and drop the useless ones effectively.



Table A6: **Results of using different text source on ImageNet-LT [1] and Places-LT [1],** where we see that “wiki + prompt” outperforms “prompt only” in overall, medium, and few accuracy.

| Dataset     | Source               | Accuracy(%) |             |             |             |
|-------------|----------------------|-------------|-------------|-------------|-------------|
|             |                      | Overall     | Many        | Medium      | Few         |
| ImageNet-LT | Baseline             | 60.5        | 74.4        | 56.9        | 34.5        |
|             | prompt only          | 69.4        | <b>77.9</b> | 66.5        | 49.3        |
|             | wiki + prompt (ours) | <b>70.1</b> | 77.8        | <b>67.0</b> | <b>50.8</b> |
| Places-LT   | Baseline             | 39.7        | 50.8        | 38.6        | 22.7        |
|             | prompt only          | 47.3        | <b>52.7</b> | 46.8        | 36.3        |
|             | wiki + prompt (ours) | <b>48.0</b> | 51.9        | <b>47.2</b> | <b>38.4</b> |

## H More Examples of Concept Visualization

In this section, we provide more concept visualization results of VL-LTR (ResNet-50) trained on ImageNet-LT [1]. As shown in Figure A3, our models can not only learn some appearance attributes such as the shape and texture, but also understand high-level concepts like “wall” and “sky”. Moreover, benefiting from CVLP, our method can cover more visual concepts than CLIP.

## References

1. Liu, Z., Miao, Z., Zhan, X., Wang, J., Gong, B., Yu, S.X.: Large-scale long-tailed recognition in an open world. In: Proc. IEEE Conf. Comp. Vis. Patt. Recogn. (2019) [1](#), [2](#), [3](#), [4](#), [5](#), [6](#)
2. Radford, A., Kim, J.W., Hallacy, C., Ramesh, A., Goh, G., Agarwal, S., Sastry, G., Askell, A., Mishkin, P., Clark, J.: Learning transferable visual models from natural language supervision. arXiv preprint arXiv:2103.00020 (2021) [1](#), [2](#), [3](#), [4](#), [7](#)
3. Van Horn, G., Mac Aodha, O., Song, Y., Cui, Y., Sun, C., Shepard, A., Adam, H., Perona, P., Belongie, S.: The inaturalist species classification and detection dataset. In: Proc. IEEE Conf. Comp. Vis. Patt. Recogn. (2018) [1](#), [2](#), [3](#)

|                                                                                                                                                                                                                                                                                                                                                                                                                                                                                                                                                                                                                                                                                                                                                                                                                                                                                                         |                                                                                                                                                                                                                                                                                                                                                                                                                                                                                                                                                                                                                                                                                                                                                                                                                                                               |
|---------------------------------------------------------------------------------------------------------------------------------------------------------------------------------------------------------------------------------------------------------------------------------------------------------------------------------------------------------------------------------------------------------------------------------------------------------------------------------------------------------------------------------------------------------------------------------------------------------------------------------------------------------------------------------------------------------------------------------------------------------------------------------------------------------------------------------------------------------------------------------------------------------|---------------------------------------------------------------------------------------------------------------------------------------------------------------------------------------------------------------------------------------------------------------------------------------------------------------------------------------------------------------------------------------------------------------------------------------------------------------------------------------------------------------------------------------------------------------------------------------------------------------------------------------------------------------------------------------------------------------------------------------------------------------------------------------------------------------------------------------------------------------|
| <p>Class Name: Goldfish</p>  <p>Good</p> <ul style="list-style-type: none"> <li>When kept in small indoor aquariums, goldfish tend to... (<math>\mathcal{L}_{lin}=3.31</math>)</li> <li>...various combinations of white, yellow, orange, red, brown, and black are known. (<math>\mathcal{L}_{lin}=3.32</math>)</li> <li>Goldfish may grow larger if moved to bigger fish tanks... (<math>\mathcal{L}_{lin}=3.33</math>)</li> </ul> <p>Bad</p> <ul style="list-style-type: none"> <li>The eggs hatch within 48 to 72 hours. (<math>\mathcal{L}_{lin}=6.05</math>)</li> <li>In <i>C. auratus</i>, this tail spot is never present. (<math>\mathcal{L}_{lin}=6.51</math>)</li> <li>The practice gradually fell out of popularity over the course of several decades... (<math>\mathcal{L}_{lin}=6.74</math>)</li> </ul> | <p>Class Name: Goldfinch</p>  <p>Good</p> <ul style="list-style-type: none"> <li>Male European goldfinches can often be distinguished by a larger, darker red mask that extends just behind the eye. (<math>\mathcal{L}_{lin}=3.56</math>)</li> <li>European goldfinches, with their "wanton freak" and "yellow flutterings"... (<math>\mathcal{L}_{lin}=3.57</math>)</li> </ul> <p>Bad</p> <ul style="list-style-type: none"> <li>ISBN 0-19-854679-3. (<math>\mathcal{L}_{lin}=7.20</math>)</li> <li>Oxford: Oxford University Press. 8,82632 (<math>\mathcal{L}_{lin}=8.03</math>)</li> <li>(1994). (<math>\mathcal{L}_{lin}=9.36</math>)</li> </ul>                                                                                                                      |
| <p>Class Name: Tree Frog</p>  <p>Good</p> <ul style="list-style-type: none"> <li>Tree frogs are usually tiny as their weight has to be carried by the branches and twigs in their habitats. (<math>\mathcal{L}_{lin}=3.57</math>)</li> <li>A tree frog is any species of frog that spends a major portion of its lifespan in trees, known as an arboreal state. (<math>\mathcal{L}_{lin}=3.61</math>)</li> </ul> <p>Bad</p> <ul style="list-style-type: none"> <li>A few also occur in East Asia. (<math>\mathcal{L}_{lin}=5.12</math>)</li> <li>The genus <i>Chiromantis</i> of the Rhacophoridae is most extreme in this respect: it can oppose two fingers to the other two, resulting in a vise-like grip. (<math>\mathcal{L}_{lin}=5.98</math>)</li> </ul>                                                        | <p>Class Name: Little Blue Heron</p>  <p>Good</p> <ul style="list-style-type: none"> <li>The little blue heron stalks its prey methodically in shallow water, often running as it does so. (<math>\mathcal{L}_{lin}=3.70</math>)</li> <li>The little blue heron nests in colonies, often with other herons, usually on platforms of sticks in trees or shrubs. (<math>\mathcal{L}_{lin}=3.86</math>)</li> </ul> <p>Bad</p> <ul style="list-style-type: none"> <li>There is post-breeding dispersal to well north of the nesting range, as far as the Canada-US border. (<math>\mathcal{L}_{lin}=5.97</math>)</li> <li>It is a resident breeder in most of its range, but some northern breeders migrate to... (<math>\mathcal{L}_{lin}=6.26</math>)</li> </ul>              |
| <p>Class Name: Lion</p>  <p>Good</p> <ul style="list-style-type: none"> <li>In Serengeti National Park, female lions favour males with dense, dark manes as mates. (<math>\mathcal{L}_{lin}=3.66</math>)</li> <li>Most lion vocalisations are variations of growling, snarling, meowing and roaring. (<math>\mathcal{L}_{lin}=3.74</math>)</li> </ul> <p>Bad</p> <ul style="list-style-type: none"> <li>The most common peaceful, tactile gestures are head rubbing and social licking, which have been compared with the role of allogrooming among primates. (<math>\mathcal{L}_{lin}=9.70</math>)</li> <li>648 BC, now in the British Museum. (<math>\mathcal{L}_{lin}=9.89</math>)</li> <li><i>melanochaita</i>. (<math>\mathcal{L}_{lin}=10.36</math>)</li> </ul>                                                | <p>Class Name: Mountain Bike</p>  <p>Good</p> <ul style="list-style-type: none"> <li>A mountain bike or mountain bicycle is a bicycle designed for off-road cycling. 3.7945313. (<math>\mathcal{L}_{lin}=3.79</math>)</li> <li>Mountain bikes are generally specialized for use on mountain trails, single track, fire roads, and other unpaved surfaces. (<math>\mathcal{L}_{lin}=3.86</math>)</li> </ul> <p>Bad</p> <ul style="list-style-type: none"> <li>There are two different kinds of disc brakes: hydraulic, which uses oil in the lines to push the brake pads against the rotors to stop the bike. (<math>\mathcal{L}_{lin}=6.32</math>)</li> <li>The general design was similar. (<math>\mathcal{L}_{lin}=6.63</math>)</li> </ul>                              |
| <p>Class Name: Scoreboard</p>  <p>Good</p> <ul style="list-style-type: none"> <li>Examples of this type of scoreboard display are seen in Kauffman Stadium. (<math>\mathcal{L}_{lin}=3.56</math>)</li> <li>Well-known examples of manual scoreboards, using numbers painted on metal sheets hung by people working inside the scoreboard... (<math>\mathcal{L}_{lin}=3.57</math>)</li> </ul> <p>Bad</p> <ul style="list-style-type: none"> <li>This helps the signal resist interference which is usually confined to a narrow frequency band. (<math>\mathcal{L}_{lin}=5.46</math>)</li> <li>Advances in large-scale integrated circuits permitted the introduction of computer control. (<math>\mathcal{L}_{lin}=7.13</math>)</li> </ul>                                                                           | <p>Class Name: Snorkel</p>  <p>Good</p> <ul style="list-style-type: none"> <li>The integral snorkels enable swimmers to keep their mouths closed, inhaling and exhaling air through their noses instead, while they are at, or just below, the surface of the water. (<math>\mathcal{L}_{lin}=4.03</math>)</li> <li>...every snorkel must be topped with a fluorescent red or orange band to... (<math>\mathcal{L}_{lin}=4.06</math>)</li> </ul> <p>Bad</p> <ul style="list-style-type: none"> <li>New-generation versions remain relatively rare commodities in the early twenty-first century. (<math>\mathcal{L}_{lin}=7.38</math>)</li> <li>He exhibited them, in fact, in 1931, at the International Nautical Show. (<math>\mathcal{L}_{lin}=8.78</math>)</li> </ul> |

Fig. A2: Some “good” and “bad” sentences and their corresponding  $\mathcal{L}_{lin}$  of classes in ImageNet-LT [1]. The value of  $\mathcal{L}_{lin}$  can reflect the usefulness of these sentences to some extent, which thereby supports the effectiveness of our AnSS.

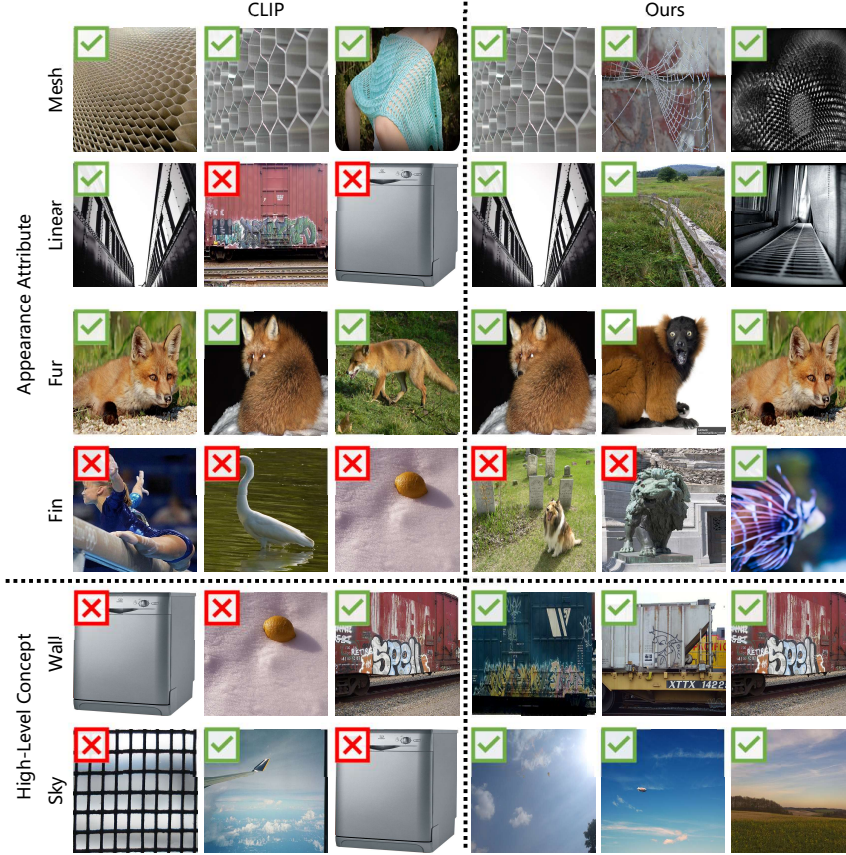

Fig. A3: **Examples of concept visualization.** Our method can not only learn the texture (*e.g.*, mesh) and shape (*e.g.*, linear) of objects, but can also understand some visual attributes (*e.g.*, fur and fin) and high-level concepts (*e.g.*, wall and sky). In addition, compared to the original CLIP [2], our method can cover more visual concepts.
